1     **Title: A causal role of the human left temporoparietal junction in computing**  
2     **social influence during goal-directed learning**

3     **Authors:** Lei Zhang<sup>1,2,9\*</sup>, Farid I. Kandil<sup>3,4</sup>, Ke Zhao<sup>5,6</sup>, Xiaolan Fu<sup>5,6</sup>, Claus Lamm<sup>2,7</sup>, Claus C.  
4     Hilgetag<sup>3,8</sup>, Jan Gläscher<sup>1\*</sup>

5     <sup>1</sup>Institute of Systems Neuroscience, University Medical Center Hamburg-Eppendorf, Hamburg,  
6     20246, Germany

7     <sup>2</sup>Social, Cognitive and Affective Neuroscience Unit, Department of Cognition, Emotion, and  
8     Methods in Psychology, Faculty of Psychology, University of Vienna, Vienna, 1010, Austria

9     <sup>3</sup>Institute of Computational Neuroscience, University Medical Center Hamburg-Eppendorf,  
10     Hamburg, 20246, Germany

11     <sup>4</sup>Department of Neurology, Charité – Universitätsmedizin Berlin, Berlin, 13353, Germany

12     <sup>5</sup> State Key Laboratory of Brain and Cognitive Science, Institute of Psychology, Chinese  
13     Academy of Sciences, Beijing, 100101, China

14     <sup>6</sup> Department of Psychology, University of Chinese Academy of Sciences, Beijing, 100049,  
15     China

16     <sup>7</sup>Vienna Cognitive Science Hub, University of Vienna, Vienna 1010, Austria

17     <sup>8</sup>Department of Health Sciences, Boston University, Boston, MA 02115, USA

18     <sup>9</sup>Twitter: @lei\_zhang\_lz

19  
20     \*Correspondence: [lei.zhang@univie.ac.at](mailto:lei.zhang@univie.ac.at) (L.Z.) or [glaescher@uke.de](mailto:glaescher@uke.de) (J.G.).  
21

## 22 **Abstract**

23 The human temporoparietal junction (TPJ) is a brain area crucial for processing social information.  
24 Although brain stimulation studies have started to explore the causal function of TPJ under social  
25 contexts, few have explicitly considered bilateral TPJ as target regions. Here, leveraging non-  
26 invasive continuous theta-burst stimulation (cTBS) and hierarchical Bayesian computational  
27 modeling, we tested whether left or right TPJ (with vertex as control) is causally involved in how  
28 dissenting choices by others influence individuals' choice adjustments in goal-directed learning.  
29 In our social learning paradigm, participants (N = 31) first made their private decision, and then  
30 were allowed to re-adjust their choices after observing choices of four other players. Behaviorally,  
31 we show that disruption of the left, but not the right TPJ, weakened participants' choice adjustment  
32 and delayed their response speed when confronted with dissenting information from the other  
33 players. Computationally, disrupting activity in the left TPJ attenuated the degree of computing  
34 social influence during choice adjustment, whereas the extent to which how observational learning  
35 from others' choices was integrated into direct learning remained intact. Together, our results  
36 provide evidence for the causal role of left TPJ in social influence during goal-directed learning  
37 and shed light on the relational function (with respect to oneself) of the TPJ in social cognition.

38

## 39 **INTRODUCTION**

40 The human temporoparietal junction (TPJ) is a brain area crucial for processing social interaction,  
41 Theory of Mind (ToM), and self-other distinction (Ruff, Fehr, 2014; Schaafsma et al., 2015;  
42 Deschrijver and Palmer, 2020; Rusch et al., 2020; Schurz et al., 2021). Despite a recent focus on  
43 the right TPJ as a primary site for representing such social information, many functional magnetic  
44 resonance imaging (fMRI) studies have indeed reported bilateral activation of TPJ in social  
45 influence in goal-directed learning (Zhang and Gläscher, 2020), strategic social decision-making  
46 (Konovalov et al., 2021), and goal emulation in observational learning (Charpentier et al., 2020),  
47 and these results are consistent with large-scale, automated meta-analytic findings reported on  
48 NeuroSynth (Yarkoni et al., 2011). For example, we have previously documented the  
49 neurocomputational role of bilateral TPJ in computing social influence in goal-directed learning,  
50 in which participants were able to re-adjust their choices after observing choices of four other  
51 players in the same learning environment (Zhang and Gläscher, 2020). To establish the causal

52 relationship between TPJ and social information processing, several brain stimulation studies have  
53 demonstrated a causal involvement of right TPJ in moral judgments (Obeso et al., 2018), social  
54 norm violation of others (Baumgartner et al., 2014), strategic social interaction (Hill et al., 2017),  
55 and self-other distinctions (Bukowski et al., 2020). However, most of these studies have, in fact,  
56 only stimulated right TPJ, and not explicitly tested the differential contributions of left and right  
57 TPJ to these phenomena.

58 To bridge this gap, here we employed a modified version of our social learning task and  
59 explicitly tested whether left or right TPJ was casually involved in representing dissenting social  
60 information when individuals were about to make choice adjustments. With the well-established  
61 continuous theta-burst stimulation (cTBS) protocol (Huang et al., 2005) to left and right TPJ and  
62 hierarchical Bayesian reinforcement learning models (Zhang et al., 2020), we reported that left,  
63 but not right, TPJ was causally related to the computation of social influence during goal-directed  
64 learning.

65

## 66 **RESULTS**

67 Human participants (N = 31, 17 females) performed a modified version of our social learning task  
68 (Zhang and Gläscher, 2020), which relies on a probabilistic reversal learning paradigm (**Figure**  
69 **1A**; Gläscher et al., 2009). On each trial, participants made their initial choice (Choice 1), and after  
70 being informed about choices from the other four players, participants were allowed to re-adjust  
71 their final choice (Choice 2), before receiving the outcome. Participants were incentivized to earn  
72 as much money as possible. As we demonstrated previously (Zhang and Gläscher, 2020), the  
73 multiple reversal structure (**Figure 1B**) entailed adequate uncertainty such that it was much wiser  
74 for the participants to consider the other players' decisions for better detection of changes after  
75 each reversal. Crucially, participants were informed that the other four players were intelligent  
76 computer algorithms (see **Materials and Methods**), which were able to learn from reward  
77 feedback as well as learn from others' choices – including the choices of the participant. The  
78 algorithms were in fact simulated from our previous computational model that best matched human  
79 behavior in the same task setup (Zhang and Gläscher, 2020). All participants underwent three  
80 cTBS sessions in a counterbalanced order (**Figure 1D**). We conducted such a fully randomized  
81 within-subject, rather than between-subject, design so as to minimize heterogeneity between

82 different groups, thus maximizing the statistical power in estimating cTBS effects (Charness et al.,  
 83 2012). The stimulation sites included the vertex (as a non-active control region) and right as well  
 84 as left TPJ, the Montreal Neurological Institute (MNI) coordinates of which (right: [50, -60, 34];  
 85 left: [-48, -62, 30]; **Figure 1E**) were extracted based on our previous finding. A neuronavigation  
 86 pipeline (Polanía et al., 2018) was implemented to obtain stimulation targets tailored to each  
 87 participant's brain anatomy.

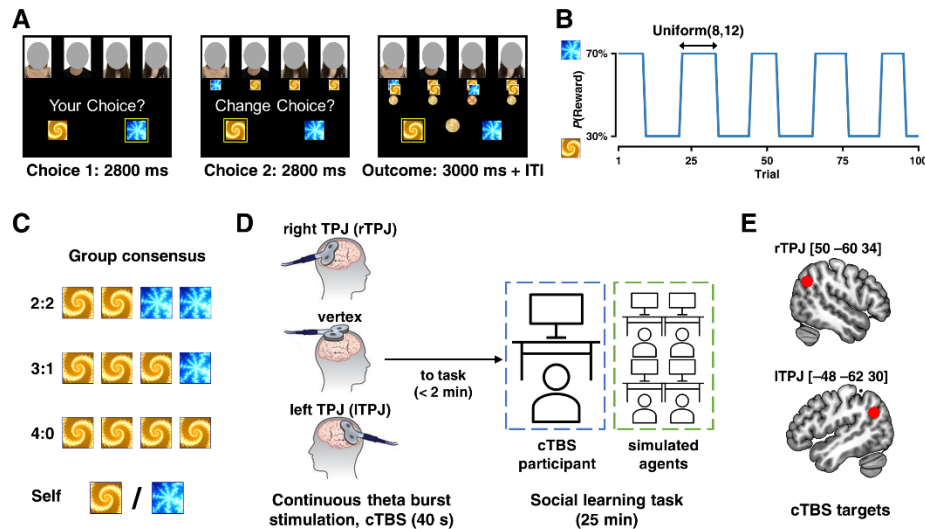

88

89 **Figure 1. Experimental design.**

90 **(A)** Task design. On each trial of the experiment, participants ( $N = 31$ ) made an initial choice (Choice 1), and after  
 91 observing the choices from the other four players, participants were asked to make adjustments (Choice 2),  
 92 followed by the outcome. Three stimulus pairs (one pair shown here) were used with a counterbalanced order  
 93 across stimulation sites.

94 **(B)** Example reward schedule. Reward contingency reversed every 8–12 trials, following a uniform distribution.

95 **(C)** Illustration of group consensus (perspective from each participant). Note that this illustration was never shown  
 96 to the participants.

97 **(D, E)** Neurostimulation protocol. After a short practice round, participants received individually localized  
 98 continuous theta-burst stimulation (cTBS) of areas of interest, right TPJ (Montreal Neurological Institute [MNI]  
 99 target coordinates [50, -60, 34]) and left TPJ (MNI [-48, -62, 30]), with the vertex as a non-active control region.  
 100 Participants underwent the experiment in an adjacent testing room next. The order of left or right TPJ cTBS was  
 101 counterbalanced across participants with vertex stimulation always between the TPJ stimulation to reduce potential  
 102 interference effects due to hemispheric crosstalk.

103

## 104 **Model-agnostic effects of cTBS on choice behavior**

105 We sought to examine whether stimulating TPJ altered choice switching, response speed, and  
 106 choice accuracy during participants' choice adjustment after social influence (i.e., Choice 2).  
 107 Across all three analyses, we were primarily interested in the stimulation effect on the interaction

108 between the relative direction of the group (with vs. against one's own first choice) and group  
109 consensus (2:2, 3:1, and 4:0, indicated from participants' perspective; **Figure 1C**), as this  
110 interaction was one of the major findings in our previous study (Zhang and Gläscher, 2020). Thus,  
111 we computed the difference between the "against" and "with" conditions at each consensus level  
112 as the dependent variable for each measurement of interest, and fitted 3 (cTBS sites: right TPJ,  
113 vertex, left TPJ)  $\times$  3 (group consensus: 2:2, 3:1, and 4:0) linear mixed models (LMM).

114 We first assessed whether stimulating TPJ reduced choice switch probability (**Figure 2A**,  
115 showing the actual data instead of the difference measurement), namely, how likely participants  
116 switched to the other choice alternative after observing the four choices of the other players. The  
117 LMM revealed a significant main effect of consensus ( $F_{2,52} = 11.460$ ,  $p < 0.001$ ;  $\beta_{\text{consensus}_{3:1}} =$   
118  $0.241$ ,  $p = 0.007$ ,  $\beta$  being the standardized coefficient;  $\beta_{\text{consensus}_{4:0}} = 0.367$ ,  $p < 0.001$ ), and a  
119 significant stimulation  $\times$  consensus interaction ( $F_{4,180} = 3.897$ ,  $p = 0.005$ ). The main effect of  
120 stimulation remained insignificant ( $F_{2,30} = 1.402$ ,  $p = 0.262$ ). This two-way interaction was largely  
121 driven by the difference in the "4:0" condition, such that disrupting activity in the left TPJ  
122 significantly reduced choice switch probability relative to the right TPJ ( $t_{64} = 3.587$ ,  $p = 0.018$ ,  
123 Tukey corrected). No other pairwise comparisons yielded significant results. Relatedly, we asked  
124 whether stimulating TPJ affected response time (RT) during participants' choice adjustment  
125 (**Figure 2B**). With the same LMM setup, we found a trend level effect of stimulation ( $F_{2,80} = 2.400$ ,  
126  $p = 0.097$ ), and the two other effects were not significant (consensus:  $F_{2,43} = 0.121$ ,  $p = 0.887$ ;  
127 interaction:  $F_{4,144} = 1.193$ ,  $p = 0.316$ ). However, we found a significant LMM effect of interaction  
128 ( $\beta_{\text{TPJ} \times \text{consensus}_{4:0}} = 0.197$ ,  $p < 0.028$ ), suggesting that the RT was longest when the activity in the  
129 left TPJ was disrupted in the consensus 4:0 condition. Last, now that we had some indication that  
130 stimulating the left TPJ impacted both choice switch probability and RT, we sought to examine  
131 whether the accuracy (i.e., deciding on the more rewarded option) of Choice 2 was also altered  
132 (**Figure 2C**), based on that we previously had observed an increased performance after  
133 incorporating others' choices (Zhang and Gläscher, 2020). Following the same LMM setup, we  
134 observed a significant main effect of consensus ( $F_{2,130} = 4.66$ ,  $p = 0.011$ ;  $\beta_{\text{consensus}_{3:1}} = 0.326$ ,  $p =$   
135  $0.020$ ). The main effect of stimulation ( $F_{2,34} = 0.490$ ,  $p = 0.617$ ) and the interaction ( $F_{4,130} = 0.524$ ,  
136  $p = 0.719$ ) were not significant.

137 Together, our model-agnostic analyses showed that when the neural activity in the left TPJ  
138 was disrupted by cTBS, participants were less inclined to adjust their choices and the associated

139 response speed of making adjustment was remarkably reduced, especially when participants'  
 140 choices were contradicted by the others' choices.

141

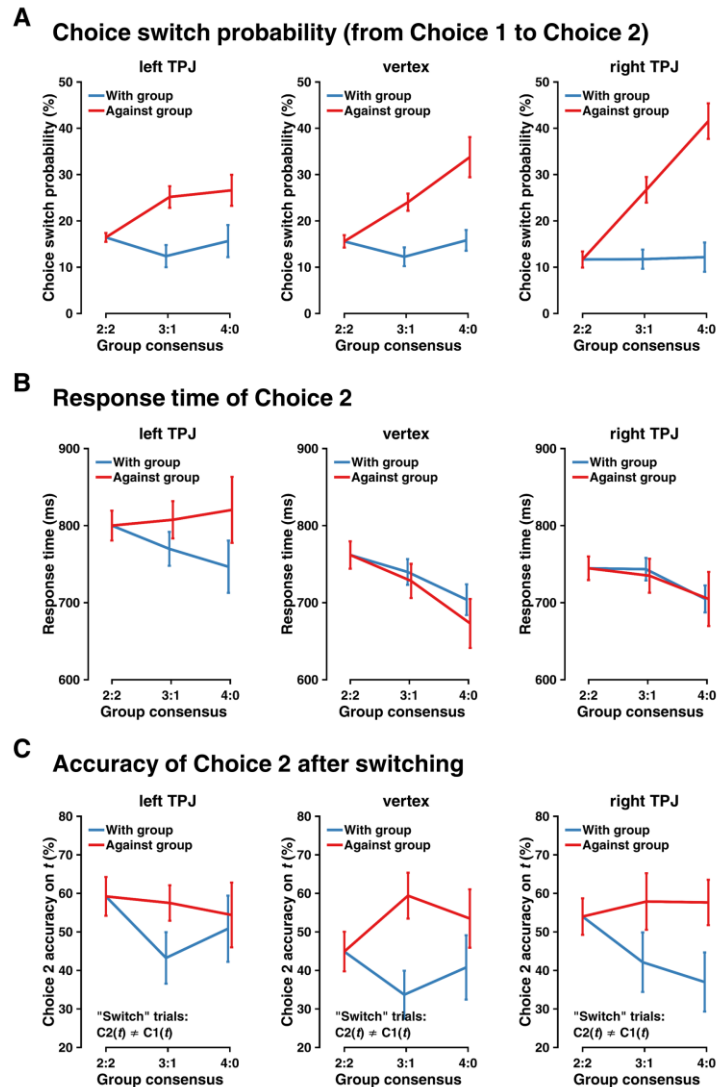

142

143 **Figure 2. Neurostimulation effects on behavior.**

144 (A) cTBS effects on participants' choice switch probability, with a focus on the interaction between group  
 145 consensus (choice consensus formulated by each computer algorithm; as Figure 1C) and relative direction (with  
 146 versus against) of the group. Lines indicate means  $\pm$  within-subject standard error.

147 (B) cTBS effects on the response time of participants' choice switching. Format is as in (A).

148 (C) cTBS effects on participants' choice accuracy after switching. Format is as in (A).

149

150 **Computational Mechanisms of social influence in goal-directed learning**

151 Using computational modeling, we aimed to formally quantify latent mechanisms underlying how  
152 social influence was computed on a trial-by-trial basis and to uncover nuanced computational  
153 contributions to the behavioral differences across cTBS sites. Although we focused on how  
154 disruption of the TPJ impacted behavior after receiving choices from the others when outcomes  
155 were delivered, participants were also able to learn the others' choice-outcome combination and  
156 integrate such observational learning (through vicarious valuation) into their own valuation on the  
157 next trial. We thus constructed our winning model (**Figure 3A**; see **Table 1** for model comparison)  
158 following the model development process similar to and detailed in our previous computational  
159 account (Zhang and Gläscher, 2020). This procedure subsequently allowed us to investigate  
160 whether disruption of TPJ altered vicarious valuation in social learning.

161 On each trial, the option value of Choice 1 (A or B) was modeled as a linear combination  
162 between values from direct learning ( $V_{\text{self}}$ ) and values from social learning ( $V_{\text{other}}$ ). After observing  
163 choices from the others, participants' Choice 2 (switch or stay) was modeled as a function of two  
164 counteracting influences: (a) the group dissension ( $N_{\text{against}}$ ) representing the social influence, and  
165 (b) the value difference between participants' chosen and unchosen options ( $V_{\text{chosen,C1,t}} -$   
166  $V_{\text{unchosen,C1,t}}$ ), representing the distinctiveness of the current value estimates. Lastly, when all  
167 outcomes were delivered,  $V_{\text{self}}$  was updated using the fictitious update reinforcement learning (RL)  
168 model (Gläscher et al., 2009; Zhang and Gläscher, 2020), whereas  $V_{\text{other}}$  was updated through  
169 tracking the other four players' choice preference history (i.e., the others' decisions in the recent  
170 past; **Figure 3B**). Considering the within-subject structure in our experimental design, we  
171 implemented the within-subject effect coding scheme with explicit variance-covariance matrices  
172 (see Star Methods) to more accurately reflect the interdependency across conditions for each  
173 participant under the hierarchical Bayesian analysis framework (Ahn et al., 2017; Zhang et al.,  
174 2020). Given the aim of the current study, we focused on the model parameters relevant to  
175 computing social influence ( $\beta(N_{\text{against}})$ ) and social learning ( $\beta(V_{\text{other}})$ ), respectively (but see **Table**  
176 **1** for all posterior parameters).

177 In line with our model-agnostic behavioral results of choice switch probability (**Figure**  
178 **2A**), the degree each participant weighed dissenting social information (i.e.,  $\beta(N_{\text{against}})$ ) during  
179 choice adjustment differed across stimulation sites (one-way repeated-measures ANOVA:  $F_{1,30} =$   
180  $9.830$ ,  $p = 0.004$ ; **Figure 3D**). Further analysis suggested that disruption of the left TPJ decreased  
181 the computation of social influence as opposed to both the right TPJ ( $t_{60} = 4.407$ ,  $p = 0.0001$ , Tukey

182 corrected) and the vertex ( $t_{60} = 2.626$ ,  $p = 0.029$ , Tukey corrected), and no significant difference  
183 was found between the right TPJ and the vertex ( $t_{60} = 1.871$ ,  $p = 0.185$ , Tukey corrected).  
184 Interestingly, no difference was found across stimulation sites regarding how participants  
185 integrated vicarious value computation (i.e.,  $\beta(V_{\text{other}})$ ) into their own learning processes (one-way  
186 repeated measures ANOVA:  $F_{1,30} = 3.718$ ,  $p = 0.061$ ; **Figure 3C**), and this result was additionally  
187 supported by a Bayes factor (Schmalz et al., 2021) analysis ( $BF_{10} = 0.106$ , with default Cauchy  
188 priors).

189 In the last step, we sought to test the association between model parameter and behavior.  
190 We reasoned that if the degree of computing social influence was reduced when the left TPJ was  
191 stimulated, we ought to anticipate its weaker predictability of switching behavior. Indeed, we  
192 found that disrupting the left TPJ led to the weakest effect of  $\beta(N_{\text{against}})$  in predicting choice switch  
193 probabilities (quantified as slopes computed from **Figure 2A**) with a simple linear regression  
194 (rTPJ:  $b = 0.084$ ,  $p = 0.004$ ; vertex:  $b = 0.109$ ,  $p = 0.031$ ; lTPJ:  $b = 0.063$ ,  $p = 0.015$ ; effects  
195 compared with Wald tests:  $p_{\text{rTPJ\_vertex}} = 0.416$ ,  $p_{\text{rTPJ\_lTPJ}} = 0.168$ ,  $p_{\text{lTPJ\_vertex}} = 0.003$ , Bonferroni  
196 corrected  $p\text{-value} = 0.05/3 = 0.016$ ; **Figure 3E**). Putting together, our computational modeling  
197 effort suggested that disruption of the left TPJ reduced the computation of social influence from  
198 the others in the group, whereas the vicarious social learning process by observing the others'  
199 actions remained intact.



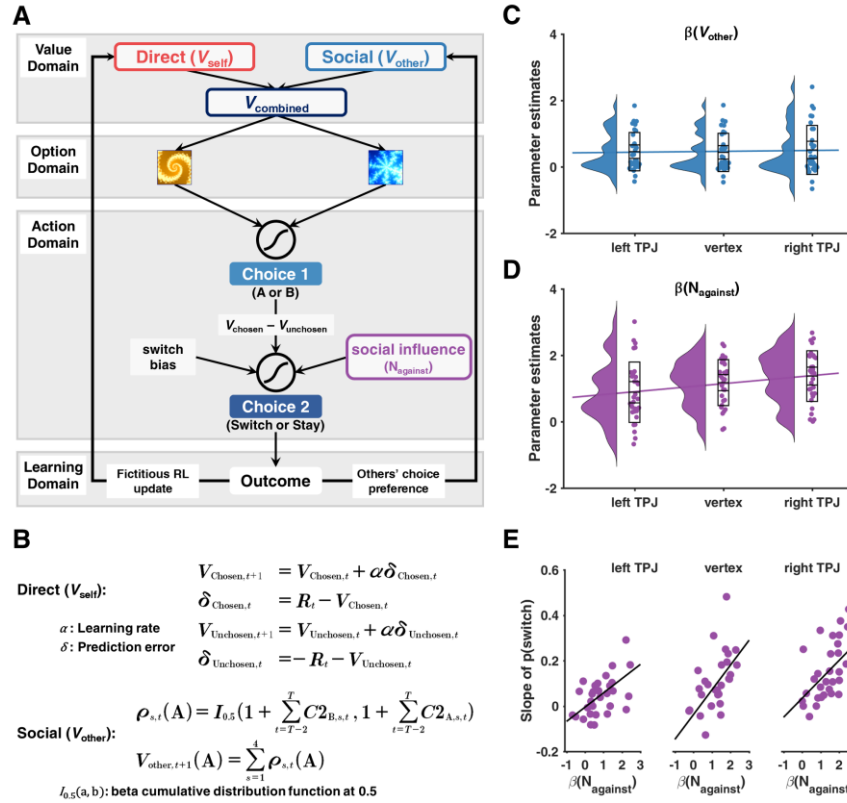

**Figure 3. Computational modeling and cTBS effects on model parameters.**

(A) Schematic representation of the winning computational model (M6). Participants' initial behaviors (Choice 1) were accounted for by value signals updated from both direct learning ( $V_{self}$ ) and social learning ( $V_{other}$ ); choice adjustments (Choice 2) were ascribed to the valuation of initial behaviors ( $V_{chosen,t} - V_{unchosen,t}$ ) and social influence from the other players ( $N_{against}$ );  $V_{self}$  was updated via a fictitious reinforcement learning model, while  $V_{other}$  was updated through tracking other players' choice preference in past trials.

(B) Computations of  $V_{self}$  and  $V_{other}$ . V, value; R, outcome;  $\alpha$ , learning rate;  $\delta$ , reward prediction error;  $\rho$ , others' choice preference;  $C2_{A/B,s}$ , others' choices;  $I_{0.5}(a,b)$ : beta cumulative distribution function at 0.5.

(C) cTBS effects on participants' degree to integrate  $V_{other}$  into their valuation ( $\beta(V_{other})$ ). Violin plots show Kernel density estimation; box plots show mean, standard error, and standard deviation; dots show individual parameter estimates.

(D) cTBS effects on participants' computation of social influence ( $\beta(N_{against})$ ). Format is as (C).

(E) cTBS effects on the relationship between  $\beta(N_{against})$  and participants' susceptibility to social influence (i.e., slope of switch probability calculated from Figure 2A).

**Table 1. Candidate computational models, model comparison, and winning model's parameters.** # Par., number of free parameters at the individual level per stimulation condition;  $\Delta$ LOOIC, leave-one-out information criterion relative to the winning model (lower LOOIC value indicates better out-of-sample predictive accuracy); weight, model weight calculated with Bayesian model averaging using Bayesian bootstrap (higher model weight value indicates higher probability of the candidate model to have generated the observed data); HDI, highest density interval estimated from the posterior distributions. M4 (in bold) is the winning model. See Materials and Methods for description of all candidate models.

| Class                                              | Model                  | Description                           | # Par.                 | $\Delta$ LOOIC | Weight |
|----------------------------------------------------|------------------------|---------------------------------------|------------------------|----------------|--------|
| Non-social model<br>(baseline)                     | M1                     | Fictitious RL                         | 4                      | 283            | 0      |
| Social model:<br>social influence                  | M2                     | M1 + social influence                 | 5                      | 117            | 0      |
| Social models:<br>social influence                 | M3                     | <b>M2 + others' RL update</b>         | 8                      | 100            | 0      |
| +<br>social learning                               | M4                     | <b>M2 + others' action preference</b> | 6                      | –              | 0.811  |
|                                                    | M5                     | <b>M2 + others' current reward</b>    | 6                      | 35             | 0.189  |
|                                                    | M6                     | <b>M2 + others' cumulative reward</b> | 7                      | 80             | 0      |
| M4 model parameters (group-level mean and 95% HDI) |                        |                                       |                        |                |        |
| Parameter                                          | left TPJ               | Vertex                                | right TPJ              |                |        |
| $\alpha$                                           | 0.25 [0.15 0.38]       | 0.30 [0.20 0.41]                      | 0.23 [0.12 0.33]       |                |        |
| $\beta(V_{\text{self}})$                           | 1.85 [1.25 2.41]       | 1.73 [1.18 2.20]                      | 1.92 [1.37 2.58]       |                |        |
| $\beta(V_{\text{other}})$                          | 0.45 [0.14 0.73]       | 0.43 [0.14 0.73]                      | 0.50 [0.19 0.86]       |                |        |
| $\beta(\text{bias})$                               | –2.06 [–2.44<br>–1.67] | –2.17 [–2.52<br>–1.79]                | –2.49 [–2.90<br>–2.12] |                |        |
| $\beta(V_{\text{chosen}} - V_{\text{unchosen}})$   | –0.65 [–0.95<br>–0.38] | –0.56 [–0.81<br>–0.29]                | –0.76 [–1.04<br>–0.48] |                |        |
| $\beta(N_{\text{against}})$                        | 0.87 [0.37 1.41]       | 1.01 [0.55 1.49]                      | 1.50 [0.95 2.02]       |                |        |

224

225

226

## DISCUSSION

227

228

229

230

231

232

233

Leveraging non-invasive brain stimulation and comprehensive computational modeling, we tested whether left or right TPJ causally supports the computation of social influence in goal-directed learning. We show that disrupting activity in the left TPJ resulted in reduced choice adjustment and declined reaction speed, especially when individuals were contradicted by the entire group. Our model further revealed that disruption of the left TPJ diminished the extent to which social influence was computed, yet the integration of social learning into individuals' own valuation was intact.

234 Our previous fMRI results (Zhang and Gläscher, 2020) clearly demonstrated that both right  
235 and left TPJ encode dissenting social information, but the current results extend these findings  
236 such that only left TPJ appears to exert a causal influence on the ensuing behavioral change.  
237 Moreover, as we previously reported that bilateral TPJ and the dissenting social information  
238 encoded therein in combination with the behavioral adjustment (and the corresponding neural  
239 signal in the dorsolateral prefrontal cortex) modulate value computations in prefrontal cortices  
240 (ventromedial prefrontal cortex, vmPFC, and anterior cingulate cortex, ACC, encoding direct  
241 learning and observational learning, respectively), it is plausible to infer a reduced connectivity  
242 pattern between left TPJ and vmPFC/ACC based on the current TMS data. It is worth noting that  
243 this reduced connectivity pattern remains speculative and future combined TMS-fMRI  
244 experiments will be required.

245 These findings are arguably in accordance with two lesion studies highlighting the role of left  
246 TPJ in mentalizing about others: patients with lesions in this part of the brain are impaired in  
247 cognitive tasks that require thinking about false beliefs of others and taking their perspective  
248 (Samson et al., 2004; Apperly et al., 2007). In addition, a recent fMRI study reported functionally  
249 different roles for left and right TPJ in an interactive decision-making task requiring representing  
250 about the other's strategies (Ogawa and Kameda, 2019). They compared human performance  
251 against another human participant, an intelligent learning algorithm, and a simple fixed probability  
252 rule, and reported that right TPJ showed the largest effect when playing against another human  
253 participant, whereas left TPJ exhibited similar effects when playing against a human or an  
254 intelligent algorithm. In light of these findings, stimulating right TPJ in our task, in which  
255 participants played together with an intelligent agent, might not have led to reduction in social  
256 influence, because no other human players were involved. In contrast, the reduction in switch  
257 probability and the correspondingly smaller  $\beta(N_{\text{against}})$  following TMS of left TPJ might reflect a  
258 more general impairment in social reasoning about the others independent of whether the  
259 interacting players are human or intelligent artificial algorithms.

260 A potential caveat of this study revolves around the role of the TPJ in the functions of the  
261 dorsal attention network (Corbetta and Shulman, 2002). Stimulating TPJ might have also corrupted  
262 attentional selection and the observed effect might simply reflect altered attentional processing  
263 rather than the encoding of dissenting social information. However, this is unlikely for several  
264 reasons. First, our stimulation site was identified as the overlapping regions between our previous

265 ROIs and the NeuroSynth brain masks resulted from “mentalizing”, rather than “attention”, as the  
266 search term. Moreover, a detailed inspection of the brain regions involved in attentional  
267 reorientation and ToM reveals spatially separable and only partially overlapping regions in the TPJ  
268 (Decety and Lamm, 2007; Carter and Huettel, 2013; Kiesow et al., 2021). Furthermore, an  
269 attentional account would leave the differences between left and right TPJ in our task unanswered.  
270 Finally, our cognitive modelling revealed that the value signal computed for the other players was  
271 non-zero and comparable in all three stimulation conditions making a pure attentional explanation  
272 rather unlikely. Nevertheless, in future brain stimulation studies of the TPJ, it would be desirable  
273 to measure the representation of social information and attentional processing simultaneously to  
274 investigate potential interaction effects more directly.

275 In conclusion, our study revealed a causal role of left TPJ in encoding dissenting social  
276 information about the choices of others and is therefore an essential node in the comprehensive  
277 brain network that integrates one’s own and others’ decisions into a coherent value signal that is  
278 used for making and updating social decisions.

279  
280  
281

## 282 **MATERIALS AND METHODS:**

283

### 284 **Data and code availability**

285 All data needed to evaluate the conclusions in the paper are present in the paper and the  
286 Supplementary Materials. Behavioral data and custom code to perform analyses can be accessed  
287 on the GitHub repository: [https://github.com/lei-zhang/SIT\\_TMS](https://github.com/lei-zhang/SIT_TMS).

288

### 289 **Participants**

290 Forty right-handed participants were invited to participate in the study. No one had any history of  
291 neurological and psychiatric diseases, nor currently used medication except contraceptives. Nine  
292 participants were excluded for various reasons: one participant had participated in our previous  
293 study, one participant had extremely low motor threshold, three participants experienced technical  
294 failure (two with experimental program crash and one with TMS device overheat), one participant  
295 did not make the choice adjustment, and four participants missed more than 30% of the responses  
296 during one or more stimulation. The final sample consisted of 31 participants (17 females). All

297 participants gave informed written consent before the experiment. The study was conducted in  
298 accordance with the Declaration of Helsinki and was approved by the Ethics Committee of the  
299 Medical Association of Hamburg (PV3661).

300

### 301 **cTBS stimulation sites**

302 We had three stimulation sites in the current experiment, right TPJ, left TPJ, and vertex. We based  
303 our bilateral TPJ stimulation sites in Brodmann area 39 on the 2nd-level neuroimaging map from  
304 the parametric modulation of dissenting social information from our previous study (Zhang &  
305 Gläscher, 2020 Figure S4/Table S4). The peaks (MNI coordinates) of the bilateral TPJ were  
306 identified at  $x = 50$ ,  $y = -60$ ,  $z = 34$  (right), and  $x = -48$ ,  $y = -62$ ,  $z = 30$  (left), respectively,  
307 considering the joint areas between our previous 2nd-level map and the meta-analytical maps  
308 derived from NeuroSynth (<https://neurosynth.org/>) using the term “mentalizing” (meta-analysis of  
309 151 studies). Subject-specific stimulation coordinates were obtained using inverse normalization  
310 with trilinear interpolation implemented in SPM12 (Statistical Parametric Mapping; Wellcome  
311 Trust Center for Neuroimaging, University College London, London, UK) from MNI space to  
312 native space. Those coordinates were then superimposed onto each participant’s native structural  
313 (T1) images obtained no older than 6 months prior to the experiment. For the non-active control  
314 site, we chose the vertex, defined for each participant in their own T1-weighted MRI scan as the  
315 intersection of the central sulci from both cerebral hemispheres. Vertex has been commonly used  
316 as a control stimulation site as stimulating vertex has minimal task-relevant effects (Polanía et al.,  
317 2018). Locating subject-specific stimulation sites, as well as creating landmarks of each  
318 participant’s brain, was implemented with the neuronavigation pipeline in theBrainsight software  
319 (Rogue Resolutions Inc Montreal, Quebec, Canada). All participants were blinded as to the  
320 stimulation sites and the neuronavigation setup.

321

### 322 **Stimulation protocols**

323 We applied a cTBS transcranial magnetic stimulation (TMS) protocol to each participant-specific  
324 coordinates identified with the above procedure, with the handle pointing posteriorly. Following  
325 previous cTBS studies on social neuroscience (e.g., Hill et al., 2017; Bukowski et al., 2020), the  
326 cTBS stimulation protocol comprised 600 pulses administered for 40 s, in bursts of 3 pulses at 50  
327 Hz (20 ms) repeated at intervals of 5 Hz (200 ms). Stimulations were controlled and delivered

328 using the Magstim-Rapid-2 stimulator with an air-cooled 70 mm figure-8 coil (Magstim Co Ltd.  
329 Spring Gardens, Whitland, UK). The stimulation intensity was determined as 80% of the active  
330 motor threshold. Motor threshold was determined as the lowest single TMS pulse intensity  
331 required (through a staircase procedure) to elicit a slightly visible twitch of the thumb and/or the  
332 index finger on in more than 5 out of 10 times stimulation while participants maintained a constant  
333 pressure between the thumb and the index finger at 20% of maximum force. We employed a  
334 within-subject design across three stimulation sites. To prevent potential carry over effect, the  
335 stimulation of the vertex was always kept in the middle, while the order between the right and the  
336 left TPJ was counterbalanced. Each experimental session lasted shorter than 25 minutes, which  
337 was adequately within the hypothesized duration of disrupted excitability at the stimulated area  
338 (Romero et al., 2020).

339

### 340 **Experimental task**

341 The core of our social learning task was a probabilistic reversal learning (PRL) paradigm, where  
342 each choice option was associated with a particular reward probability (i.e., 70% and 30%). After  
343 a variable length of trials (i.e., 8-12 trials), the reward contingencies reversed, such that individuals  
344 needed to re-adapt to the new reward contingencies in order to maximize their outcome. That said,  
345 the PRL task assured constant learning throughout the entire experiment.

346

347 Different from our previous study involving real-time interactions of 5 participants (Zhang and  
348 Gläscher, 2020), in the current study only one participant was tested. For each experimental  
349 session, participants were informed that they were about to play with four independent “intelligent  
350 computer algorithms” that best matched human behavior in the previous study. Hence, there was  
351 no deception in the current study. Importantly, participants were instructed that those computer  
352 algorithms were able to learn from their own errors, and also take decisions of the others into  
353 consideration (i.e., the other three algorithms together with the participant). In fact, these  
354 algorithms were simulated from the best computational model in our full version social learning  
355 task (Zhang and Gläscher, 2020). To better maintain participants’ attention and ecological validity,  
356 we used human faces to indicate the computer algorithms during the experimental presentation.

357

358 The task consisted of 3 phases for every trial. (i) Phase 1. Initial choice (Choice 1). Upon the  
359 presentation of two choice options using abstract fractals, participants were asked to make their  
360 1st choice (2800 ms). A yellow frame was then presented to highlight the chosen option. (ii) Phase  
361 2. Choice adjustment (Choice 2). When all four other choices were presented, participants were  
362 able to adjust their choices given the social information (2800 ms). The yellow frame was shifted  
363 accordingly to highlight the adjusted choice. (iii) Phase 3. Outcome delivery. Finally, the outcome  
364 was determined by participants' 2nd choice (3000 ms plus a jittered inter-trial interval 2000 – 4000  
365 ms; Figure 1A). Outcomes of the other four players were also displayed. On each trial, the reward  
366 was assigned to only one choice option given the reward probability, whereas choosing the other  
367 option would lead to a punishment. The reward realization sequence (trial-by-trial complementary  
368 win and loss) was generated with a pseudo-random order. Three pairs of abstract fractals were  
369 used in the current study, with a fully counterbalanced assignment together with the stimulation  
370 sites. All participants were compensated with a base payment of 20 Euro plus the average reward  
371 they achieved across three sessions of the experiment. Finally, the experiment ended with an  
372 informal debriefing session.

373

### 374 **Behavioral data acquisition**

375 Stimulus presentation and response recording were accomplished with Matlab R2014b  
376 ([www.mathworks.com](http://www.mathworks.com)) and Cogent2000 ([www.vislab.ucl.ac.uk/cogent.php](http://www.vislab.ucl.ac.uk/cogent.php)). Buttons of “V” and  
377 “B” on the keyboard corresponded to the left and right choice options, respectively. To avoid motor  
378 artifacts, the position of the two choices options was counterbalanced for all participants.

379

### 380 **Behavioral data analysis**

381 We tested the cTBS effects on participants' choice adjustment after observing the social  
382 information (during Phase 3 of the task), by three key measurements: (1) choice switch probability,  
383 (2) response time (RT), and (3) choice accuracy. According to our previous finding, here, we were  
384 particularly interested in the stimulation effect on the interaction between the relative direction of  
385 the group (with vs. against) and group consensus (2:2, 3:1, and 4:0, view of each participant).  
386 Therefore, we computed the difference measurement between the “against” and “with” conditions  
387 at each group consensus level as the dependent variable of interest. Accordingly, we performed 3  
388 (cTBS sites: right TPJ, vertex, left TPJ) × 3 (group consensus: 2:2, 3:1, and 4:0) linear mixed

389 models (LMM), with stimulation sites and group consensus as fixed factors (with interaction) and  
390 random slopes (without interaction), and participants as random intercept:  $y \sim \text{stimulation} * \text{consensus} + (1 + \text{stimulation} + \text{consensus} | \text{ID})$ . This LMM structure was identical for the analyses  
391 of Choice 2's switch probability, RT, and accuracy.  
392

393 All statistical tests were performed in R (v3.7.1; [www.r-project.org](http://www.r-project.org)). All repeated-measures  
394 LME models were analyzed with the “lme4” package and summarized with the “BruceR” package  
395 (<https://github.com/psychbruce/bruceR>). Results were considered statistically significant at the  
396 level  $p < 0.05$ . Multiple comparison correction was applied whenever appropriate.  
397

398

399

### 399 **Computational modeling**

400 The computational modeling procedures are fully documented in our previous work (Zhang and  
401 Gläscher, 2020), and for the consideration of enhancing accessibility and reproducibility, we repeat  
402 the main points relevant to the current study herein. Note that, we deem that it is the best practice  
403 to deviate as little as possible from our previous modeling description.  
404

405

405 We constructed three categories of models: baseline non-social model (M1), social model (M2)  
406 with only social influence (before receiving the outcome), and social model (M3–M6) with both  
407 social influence and social learning (before receiving the outcome).  
408

409

409 In all models, Choice 1 was accounted for by the option values of option A and option B:

$$410 \quad \mathbb{V}_t = [V_t(\text{A}), V_t(\text{B})], \quad (1)$$

411 where  $V_t$  indicated a two-element vector consisting of option values of A and B on trial  $t$ . Values  
412 were then converted into action probabilities using a Softmax function. On trial  $t$ , the action  
413 probability of choosing option A was defined as follows:

$$414 \quad p_t(\text{A}) = \frac{e^{V_t(\text{A})}}{e^{V_t(\text{A})} + e^{V_t(\text{B})}} = \frac{1}{1 + e^{-(V_t(\text{A}) - V_t(\text{B}))}}. \quad (2)$$

415 For Choice 2, we modeled it as a “switch” (coded as 1) or a “stay” (coded as 0) with respect to  
416 Choice 1 using a logistic regression. On trial  $t$ , the probability of switching given the switch value  
417 was defined as follows:



418 
$$p_t(\text{switch}) = \Phi(V_t(\text{switch})), \quad (3)$$

419 where  $\Phi$  was the inverse logit linking function:

420 
$$\Phi(x) = \frac{1}{1 + e^{-x}}. \quad (4)$$

421 It is worth noting that, in model specifications of the action probability, we did not include the  
 422 commonly used inverse Softmax temperature parameter  $\tau$  (except M1). This was because we  
 423 explicitly constructed the option values of Choice 1 and the switch value of Choice 2 in a design-  
 424 matrix fashion. Therefore, including the inverse Softmax temperature parameter would inevitably  
 425 give rise to a multiplication term, which, as a consequence, would cause unidentifiable parameter  
 426 estimation.

427 In the simplest model (M1), a fictitious update Rescorla-Wagner model was used to model the  
 428 Choice 1, as we have demonstrated that the fictitious update model outperformed the standard  
 429 single update Rescorla-Wagner (Rescorla and Wagner, 1972) model and Pearce-Hall (Pearce and  
 430 Hall, 1980) model with dynamic learning rate. Here, both the chosen value and the unchosen value  
 431 were updated, as in:

$$\begin{aligned} \delta_{\text{chosen},C2,t} &= R_t - V_{\text{chosen},C2,t} \\ \delta_{\text{unchosen},C2,t} &= -R_t - V_{\text{unchosen},C2,t} \\ V_{\text{chosen},C2,t+1} &= V_{\text{chosen},C2,t} + \alpha \delta_{\text{chosen},C2,t} \\ V_{\text{unchosen},C2,t+1} &= V_{\text{unchosen},C2,t} + \alpha \delta_{\text{unchosen},C2,t}, \end{aligned} \quad (5)$$

432

433 where  $R_t$  was the outcome on trial  $t$ , and  $\alpha$  ( $0 < \alpha < 1$ ) denoted the learning rate that accounted for  
 434 the weight of reward prediction error in value update. A beta weight ( $\beta_v$ ; akin to the inverse  
 435 temperature parameter) was multiplied with the values before being submitted to Eq. 2 with a  
 436 Categorical distribution, as in:

437 
$$C1_t \sim \text{Categorical}(\text{Softmax}(\beta_v V_t)). \quad (6)$$

438 Because there was no social information in M1a, the switch value of Choice 2 was comprised  
 439 merely of the value difference of Choice 1 and a switching bias (i.e., intercept):

440 
$$V_t(\text{switch}) = \beta_{\text{bias}C2} + \beta_{\text{vdiff}C2} (V_{\text{chosen},C1,t} - V_{\text{unchosen},C1,t}). \quad (7)$$

441 Choice 2 was then modeled with this switch value following a Bernoulli distribution:

442 
$$C2 \sim \text{Bernoulli}(V_t(\text{switch})). \quad (8)$$

443

444 M2 tested whether observing choices from the other players (i.e., social influence) contributed to  
 445 the choice switching. As on top of M1, only the switch value of Choice 2 was modified:

$$V_t(\text{switch}) = \beta_{\text{bias}} + \beta_{\text{vdiff}} (V_{\text{chosen}C1,t} - V_{\text{unchosen}C1,t}) + \beta_{\text{against}} N_{\text{against},t}, \quad (9)$$

447 where  $N_{\text{against},t}$  denoted the amount of dissenting social information relative to each participant's  
 448 Choice 1 on trial  $t$ .

449  
 450 M3–M6 assessed whether participants learned from their social partners and whether they updated  
 451 vicarious option values through social learning, by testing several competing hypotheses of how  
 452 vicarious valuation contributed to Choice 1 on the following trial. Across M3–M6, the option  
 453 values of Choice 1 was specified by a weighted combination between  $V_{\text{self}}$  updated via direct  
 454 learning and  $V_{\text{other}}$  updated via social learning, and M3–M6 differed on the specification of  $V_{\text{other}}$ .

$$V_t = \beta_{\text{vself}} V_{\text{self},t} + \beta_{\text{vother}} V_{\text{other},t}, \quad (10)$$

456 where

$$\begin{aligned} V_{\text{self},t} &= [V_{\text{self},t}(\text{A}), V_{\text{self},t}(\text{B})] \\ V_{\text{other},t} &= [V_{\text{other},t}(\text{A}), V_{\text{other},t}(\text{B})]. \end{aligned} \quad (11)$$

458  
 459 M3 tested whether individuals recruited a similar RL algorithm to their own when learning option  
 460 values from observing others. As such, M3 assumed participants to update values “for” the others  
 461 using the same fictitious update rule for themselves:

$$\begin{aligned} \delta_{s,\text{chosen},C2,t} &= R_{s,t} - V_{s,\text{chosen},C2,t}, \quad s = 1, 2, 3, 4 \\ \delta_{s,\text{unchosen},C2,t} &= -R_{s,t} - V_{s,\text{unchosen},C2,t} \\ V_{s,\text{chosen},C2,t+1} &= V_{s,\text{chosen},C2,t} + \alpha_o \delta_{s,\text{chosen},C2,t} \\ V_{s,\text{unchosen},C2,t+1} &= V_{s,\text{unchosen},C2,t} + \alpha_o \delta_{s,\text{unchosen},C2,t}, \end{aligned} \quad (12)$$

463 where  $s$  denoted the index of the four other co-players. These option values from the four co-  
 464 players were then preference-weighted and summed to formulate  $V_{\text{other}}$ , as follows:

$$\begin{aligned} V_{\text{other},t+1}(\text{A}) &= \sum_{s=1}^4 V_{s,t+1}(\text{A}) \\ V_{\text{other},t+1}(\text{B}) &= \sum_{s=1}^4 V_{s,t+1}(\text{B}). \end{aligned} \quad (13)$$

466 To ensure that the corresponding value-related parameters ( $\beta_{V_{\text{self}}}$  and  $\beta_{V_{\text{other}}}$  in Eq. 10) were  
 467 comparable,  $V_{\text{other}}$  (across M3–M6) was further normalized to lie between  $-1$  and  $1$  with the  $\Phi(x)$   
 468 function defined in Eq. 4:

$$\begin{aligned} V_{\text{other},t+1}(\text{A}) &= 2\Phi(V_{\text{other},t+1}(\text{A})) - 1 \\ V_{\text{other},t+1}(\text{B}) &= 2\Phi(V_{\text{other},t+1}(\text{B})) - 1. \end{aligned} \quad (14)$$

469  
 470  
 471 One may argue that having four independent RL agents as in M3 was cognitively demanding. We,  
 472 therefore, constructed three additional models (M4–M6) that employed simpler but distinct  
 473 computations to update vicarious values via social learning. Now that M3 considered both choice  
 474 and outcome to determine the action value, we asked if using either choice or outcome alone may  
 475 perform as well as, or even better than, M3. That said, we constructed M4 that updated  $V_{\text{other}}$  using  
 476 only the others' action preference, M5 that considered the others' current outcome, and M6 that  
 477 tracked the others' cumulative outcome, to resemble the value update via observational learning.

478  
 479 In M4, other players' action preference ( $\rho$ ) is derived from the choice history over the last three  
 480 trials (from  $T-2$  to  $T$ ) using the cumulative distribution function of the beta distribution at the value  
 481 of  $0.5$  ( $I_{0.5}$ ). That is:

$$\begin{aligned} \rho_{s,t}(\text{A}) &= I_{0.5}\left(1 + \sum_{t=T-2}^T C_{\text{B},s,t}, 1 + \sum_{t=T-2}^T C_{\text{A},s,t}\right) \\ \rho_{s,t}(\text{B}) &= 1 - \rho_{s,t}(\text{A}) \end{aligned}, \quad (15)$$

482  
 483 To illustrate, if one co-player chose option A twice and option B once, the action preference of  
 484 choosing A for him/her was:  $I_{0.5}(\text{frequency of B} + 1, \text{frequency of A} + 1) = I_{0.5}(0.5, 1 + 1, 2 + 1)$   
 485  $= 0.6875$ .  $V_{\text{other}}$  was computed based on these action preferences:

$$\begin{aligned} V_{\text{other},t+1}(\text{A}) &= \sum_{s=1}^4 \rho_{s,t}(\text{A}) \\ V_{\text{other},t+1}(\text{B}) &= \sum_{s=1}^4 \rho_{s,t}(\text{B}) \end{aligned}. \quad (16)$$

486  
 487  
 488 By contrast, M5 tested whether participants updated  $V_{\text{other}}$  using only each other's reward on the  
 489 current trial, which was equivalent to the standard Rescorla-Wagner model with  $\alpha = 1$ , indicating  
 490 no trial-by-trial learning:

$$\begin{aligned}
 V_{\text{other},t+1}(\text{A}) &= \sum_{s=1}^{K_A} R_{s,t}, K_A = 0, 1, \dots, 4 \\
 V_{\text{other},t+1}(\text{B}) &= \sum_{s=1}^{4-K_A} R_{s,t}
 \end{aligned}
 \tag{17}$$

where  $K_A$  denoted the number of other players who decided on option A on trial  $t$ .

Lastly, M6 assessed whether participants tracked cumulated reward histories over the last few trials instead of monitoring only the most recent outcome of the others, with a discounted reward history over the last three trials:

$$\begin{aligned}
 V_{\text{other},t+1}(\text{A}) &= \sum_{s=1}^{K_A} \sum_{t=T-2}^T \gamma^{T-t} R_{s,t}, K_A = 0, 1, \dots, 4 \\
 V_{\text{other},t+1}(\text{B}) &= \sum_{s=1}^{4-K_A} \sum_{t=T-2}^T \gamma^{T-t} R_{s,t}
 \end{aligned}
 \tag{18}$$

where  $\gamma$  ( $0 < \gamma < 1$ ) denoted the rate of exponential decay, all other notions were as in Eq. 17.

### Model estimation with hierarchical Bayesian analysis

Model estimations of all candidate models were performed with hierarchical Bayesian analysis (HBA; Gelman et al., 2013) using a newly developed statistical computing language Stan (Carpenter et al., 2017) in R, following the implementation in the “hBayesDM” package (Ahn et al., 2013). Stan utilizes a Hamiltonian Monte Carlo (HMC; and efficient Markov Chain Monte Carlo, MCMC) sampling scheme to perform full Bayesian inference and obtain the actual posterior distribution. We additionally implemented effect coding to account inter-dependencies in within-subject experimental design. Let  $\varphi_{s,c}$  denote a generic individual-level parameter of participant  $s$  in stimulation site  $c$ .  $\varphi_{s,c}$  was drawn from a group-level multivariate normal distribution:

$$\varphi_{s,c} \sim \text{Normal}(\boldsymbol{\mu}_\varphi, \boldsymbol{\Sigma}_\varphi)
 \tag{19}$$

Here,  $\boldsymbol{\mu}_\varphi$  was a three-element vector (1: vertex, 2: right TPJ, 3: left TPJ) of group-level means, where  $\boldsymbol{\mu}_2$ , and  $\boldsymbol{\mu}_3$  were effect-coded as the difference with respect to  $\boldsymbol{\mu}_1$ :

$$\boldsymbol{\mu} = (\boldsymbol{\mu}_1, \boldsymbol{\mu}_2, \boldsymbol{\mu}_3) = \begin{pmatrix} 1 & 0 & 0 \\ 1 & 1 & 0 \\ 1 & 0 & 1 \end{pmatrix} (\boldsymbol{\mu}_1, \boldsymbol{\mu}_2 - \boldsymbol{\mu}_1, \boldsymbol{\mu}_3 - \boldsymbol{\mu}_1)^T
 \tag{20}$$

513  $\Sigma_\varphi$  was a variance-covariance matrix denoting the group-level multivariate standard deviation, and  
514 it could be decomposed with the corresponding correlation matrix  $\Omega_\varphi$  of correlation coefficients  $r$ :

$$\Sigma_\varphi = \begin{pmatrix} \sigma_1^2 & \sigma_{12} & \sigma_{13} \\ \sigma_{12} & \sigma_2^2 & \sigma_{23} \\ \sigma_{13} & \sigma_{23} & \sigma_3^2 \end{pmatrix} = \begin{pmatrix} \sigma_1 & 0 & 0 \\ 0 & \sigma_2 & 0 \\ 0 & 0 & \sigma_3 \end{pmatrix} \Omega_\varphi \begin{pmatrix} \sigma_1 & 0 & 0 \\ 0 & \sigma_2 & 0 \\ 0 & 0 & \sigma_3 \end{pmatrix}, \quad (21)$$

515  
516 where,

$$\Omega_\varphi = \begin{pmatrix} 1 & r_{12} & r_{13} \\ r_{12} & 1 & r_{23} \\ r_{13} & r_{23} & 1 \end{pmatrix}. \quad (22)$$

517  
518 And lastly, the correlation matrix was reparameterized by Cholesky decomposition factor, noted  
519 as two triangular matrices ( $L_\varphi L_\varphi'$ ). All these group-level parameters were specified with weakly-  
520 informative priors (Gelman et al., 2013):  $\mu_\varphi \sim \text{Normal}(0, 1)$ ,  $\Sigma_\varphi \sim \text{half-Cauchy}(0, 3)$ , and  $L_\varphi \sim$   
521 LJK (2). All parameters were unconstrained except for  $\alpha$  and  $\gamma$  (both [0 1] constraint, with inverse  
522 probit transform). We fit each candidate model with four independent MCMC chains using 1000  
523 iterations after 1000 iterations for the initial algorithm warmup per chain, which resulted in 4000  
524 valid posterior samples. The convergence of the MCMC chains was assessed both visually (from  
525 the trace plot) and through the Gelman-Rubin  $\hat{R}$  Statistics (Gelman and Rubin, 1992).  $\hat{R}$  values of  
526 all parameters were close to 1.0 (at most smaller than 1.05 in the current study), which indicated  
527 adequate convergence.

528

529 For model comparison, we computed the Leave-One-Out information criterion (LOOIC) score per  
530 candidate model (Vehtari et al., 2016). The LOOIC score provides the point-wise estimate (using  
531 the entire posterior distribution) of out-of-sample predictive accuracy in a fully Bayesian way,  
532 which is more reliable compared to point-estimate information criterion (e.g., Akaike information  
533 criterion, AIC). We additionally performed Bayesian model averaging (BMA) with Bayesian  
534 bootstrap (Yao et al., 2018) to compute the probability of each candidate model being the best  
535 model.

536

### 537 **SUPPLEMENTARY INFORMATION:**

538 Supplemental Information includes 3 tables can be found with this article at <http://xxxx>.

539

540

## **ACKNOWLEDGMENTS:**

541

We thank Vivien Breckwoldt and Kevin Rozario for help with data acquisition. L.Z. was supported the Research Promotion Fund (FFM) for young scientists of the University Medical Center Hamburg-Eppendorf, the Vienna Science and Technology Fund (WWTF VRG13-007), and the Austrian Science Fund (FWF-M3166). J.G., C.C.H., F.I.K, K.Z., and X.F. were supported by the Collaborative Research Centers “Cross-modal learning” (DFG TRR 169). C.C.H. was additionally supported by the Landesforschungsförderung FHH, CRC 936 “Multisite Communication in the Brain”, and the Human Brain Project HBP SGA3. Furthermore, J.G. was supported by the Bernstein Award for Computational Neuroscience (BMBF 01GQ1006), the Collaborative Research Center “Cognition of Interaction” (DFG SFB 1528), and a Collaborative Research in Computational Neuroscience (CRCNS) grant (BMBF 01GQ1603).

551

552

## **AUTHOR CONTRIBUTIONS:**

553

**L.Z.:** Conceptualization, Data curation, Formal Analysis, Funding acquisition, Investigation, Methodology, Project administration, Data Acquisition, Software, Validation, Visualization, Writing – original draft, Writing – review & editing. **F.I.K.:** Investigation, Methodology, Resources, Validation, Writing – review & editing. **K.Z.:** Validation, Writing – review & editing. **X.F.:** Validation, Writing – review & editing. **C.L.:** Validation, Writing – review & editing. **C.C.H.:** Funding acquisition, Resources, Supervision, Validation, Writing – review & editing. **J.G.:** Conceptualization, Formal Analysis, Funding acquisition, Methodology, Data Acquisition, Project administration, Resources, Supervision, Validation, Writing – original draft, Writing – review & editing.

562

563

## **DECLARATION OF INTERESTS:**

564

The authors declare no competing financial interests.

565  
566  
567  
568  
569  
570  
571  
572  
573  
574  
575  
576  
577  
578  
579  
580  
581  
582  
583  
584  
585  
586  
587  
588  
589  
590  
591  
592  
593  
594  
595  
596  
597  
598  
599  
600  
601  
602  
603  
604  
605  
606  
607  
608  
609  
610  
611  
612  
613  
614

## REFERENCES:

- Ahn W-Y, Haines N, Zhang L. 2017. Revealing neurocomputational mechanisms of reinforcement learning and decision-making with the hBayesDM package. *Comput Psychiatry* **1**:24–57. doi:10.1162/CPSY\_a\_00002
- Apperly IA, Samson D, Chiavarino C, Bickerton W-L, Humphreys GW. 2007. Testing the domain-specificity of a theory of mind deficit in brain-injured patients: Evidence for consistent performance on non-verbal, “reality-unknown” false belief and false photograph tasks. *Cognition* **103**:300–321. doi:10.1016/j.cognition.2006.04.012
- Baumgartner T, Schiller B, Rieskamp J, Gianotti LRR, Knoch D. 2014. Diminishing parochialism in intergroup conflict by disrupting the right temporo-parietal junction. *Soc Cogn Affect Neurosci* **9**:653–660. doi:10.1093/scan/nst023
- Bukowski H, Tik M, Silani G, Ruff CC, Windischberger C, Lamm C. 2020. When differences matter: rTMS/fMRI reveals how differences in dispositional empathy translate to distinct neural underpinnings of self-other distinction in empathy. *Cortex* **128**:143–161. doi:10.1016/j.cortex.2020.03.009
- Carpenter B, Gelman A, Hoffman MD, Lee D, Goodrich B, Betancourt M, Brubaker M, Guo J, Li P, Riddell A. 2017. Stan : A Probabilistic Programming Language. *J Stat Softw* **76**:1–32. doi:10.18637/jss.v076.i01
- Carter RM, Huettel SA. 2013. A nexus model of the temporal–parietal junction. *Trends Cogn Sci* **17**:328–336. doi:10.1016/j.tics.2013.05.007
- Charness G, Gneezy U, Kuhn MA. 2012. Experimental methods: Between-subject and within-subject design. *J Econ Behav Organ* **81**:1–8. doi:10.1016/j.jebo.2011.08.009
- Charpentier CJ, Iigaya K, O’Doherty JP. 2020. A Neuro-computational Account of Arbitration between Choice Imitation and Goal Emulation during Human Observational Learning. *Neuron* **106**:687–699.e7. doi:10.1016/j.neuron.2020.02.028
- Corbetta M, Shulman GL. 2002. Control of goal-directed and stimulus-driven attention in the brain. *Nat Rev Neurosci* **3**:201–215. doi:10.1038/nrn755
- Decety J, Lamm C. 2007. The role of the right temporoparietal junction in social interaction: How low-level computational processes contribute to meta-cognition. *Neuroscientist* **13**:580–593. doi:10.1177/1073858407304654
- Deschrijver E, Palmer C. 2020. Reframing social cognition: Relational versus representational mentalizing. *Psychol Bull* **146**:941–969. doi:10.1037/bul0000302
- Gelman A, Rubin DB. 1992. Inference from iterative simulation using multiple sequences. *Stat Sci* **7**:457–472. doi:10.1214/ss/1177011136
- Gelman A, Stern HS, Carlin JB, Dunson DB, Vehtari A, Rubin DB. 2013. Bayesian data analysis. Boca Raton, FL: Chapman and Hall/CRC.
- Gläscher J, Hampton AN, O’Doherty JP. 2009. Determining a role for ventromedial prefrontal cortex in encoding action-based value signals during reward-related decision making. *Cereb Cortex* **19**:483–495. doi:10.1093/cercor/bhn098
- Hill C, Suzuki S, Polanía R, Moisa M, O’Doherty JP, Ruff CC. 2017. A causal account of the brain network computations underlying strategic social behavior. *Nat Neurosci* **20**:1142–1149. doi:10.1038/nn.4602
- Huang Y-Z, Edwards MJ, Rounis E, Bhatia KP, Rothwell JC. 2005. Theta Burst Stimulation of the Human Motor Cortex. *Neuron* **45**:201–206. doi:10.1016/j.neuron.2004.12.033
- Kiesow H, Spreng RN, Holmes AJ, Chakravarty MM, Marquand AF, Yeo BTT, Bzdok D. 2021. Deep learning identifies partially overlapping subnetworks in the human social brain. *Commun Biol* **4**:65. doi:10.1038/s42003-020-01559-z
- Kononov A, Hill C, Daunizeau J, Ruff CC. 2021. Dissecting functional contributions of the social brain to strategic behavior. *Neuron* **109**:3323–3337.e5. doi:10.1016/j.neuron.2021.07.025
- Obeso I, Moisa M, Ruff CC, Dreher J-C. 2018. A causal role for right temporo-parietal junction in signaling moral conflict. *Elife* **7**:1–16. doi:10.7554/eLife.40671

- 615 Ogawa A, Kameda T. 2019. Dissociable roles of left and right temporoparietal junction in strategic com-  
616 petitive interaction. *Soc Cogn Affect Neurosci* **14**:1037–1048. doi:10.1093/scan/nsz082
- 617 Pearce JM, Hall G. 1980. A model for Pavlovian learning: Variations in the effectiveness of conditioned  
618 but not of unconditioned stimuli. *Psychol Rev* **87**:532–552. doi:10.1037/0033-295X.87.6.532
- 619 Polanía R, Nitsche MA, Ruff CC. 2018. Studying and modifying brain function with non-invasive brain  
620 stimulation. *Nat Neurosci* **21**:174–187. doi:10.1038/s41593-017-0054-4
- 621 Rescorla RA, Wagner AR. 1972. A theory of Pavlovian conditioning: Variations in the effectiveness of  
622 reinforcement and nonreinforcement Classical Conditioning II: Current Research and Theory. New  
623 York, NY: Appleton-Century-Crofts. pp. 64–99.
- 624 Romero MC, Merken L, Janssen P, Davare M. 2020. Neural effects of continuous theta-burst stimulation  
625 in macaque parietal neurons. *bioRxiv*. doi:10.1101/2020.12.07.414482
- 626 Ruff CC, Fehr E. 2014. The neurobiology of rewards and values in social decision making. *Nat Rev Neu-*  
627 *rosci* **15**:549–562. doi:10.1038/nrn3776
- 628 Rusch T, Steixner-Kumar S, Doshi P, Spezio M, Gläscher J. 2020. Theory of mind and decision science:  
629 Towards a typology of tasks and computational models. *Neuropsychologia* **146**:107488.  
630 doi:10.1016/j.neuropsychologia.2020.107488
- 631 Samson D, Apperly IA, Chiavarino C, Humphreys GW. 2004. Left temporoparietal junction is necessary  
632 for representing someone else’s belief. *Nat Neurosci* **7**:499–500. doi:10.1038/nn1223
- 633 Schaafsma SM, Pfaff DW, Spunt RP, Adolphs R. 2015. Deconstructing and reconstructing theory of  
634 mind. *Trends Cogn Sci* **19**:65–72. doi:10.1016/j.tics.2014.11.007
- 635 Schmalz X, Biurrun Manresa J, Zhang L. 2021. What is a Bayes factor? *Psychol Methods*.  
636 doi:10.1037/met0000421
- 637 Schurz M, Radua J, Tholen MG, Maliske L, Margulies DS, Mars RB, Sallet J, Kanske P. 2021. Toward a  
638 hierarchical model of social cognition: A neuroimaging meta-analysis and integrative review of em-  
639 pathy and theory of mind. *Psychol Bull* **147**:293–327. doi:10.1037/bul0000303
- 640 Vehtari A, Gelman A, Gabry J. 2016. Practical Bayesian model evaluation using leave-one-out cross-vali-  
641 dation and WAIC. *Stat Comput* **27**:1–20. doi:10.1007/s11222-016-9696-4
- 642 Yao Y, Vehtari A, Simpson D, Gelman A. 2018. Using Stacking to Average Bayesian Predictive Distri-  
643 butions (with Discussion). *Bayesian Anal* **13**:917–1007. doi:10.1214/17-BA1091
- 644 Yarkoni T, Poldrack RA, Nichols TE, Van Essen DC, Wager TD. 2011. Large-scale automated synthesis  
645 of human functional neuroimaging data. *Nat Methods* **8**:665–670. doi:10.1038/nmeth.1635
- 646 Zhang L, Gläscher J. 2020. A brain network supporting social influences in human decision-making. *Sci*  
647 *Adv* **6**:eabb4159. doi:10.1126/sciadv.abb4159
- 648 Zhang L, Lengersdorff L, Mikus N, Gläscher J, Lamm C. 2020. Using reinforcement learning models in  
649 social neuroscience: frameworks, pitfalls and suggestions of best practices. *Soc Cogn Affect Neuro-*  
650 *sci* **15**:695–707. doi:10.1093/scan/nsaa089
